# 1 A review of the relation between species traits and extinction risk

2

3 Filipe Chichorro<sup>1\*</sup>, Aino Juslén<sup>2</sup> and Pedro Cardoso<sup>1</sup>

4 <sup>1</sup>LiBRE – Laboratory for Integrative Biodiversity Research, Finnish Museum of Natural History, University of  
5 Helsinki, PO Box 17 (Pohjoinen Rautatiekatu 13), 00014 Helsinki, Finland

6 <sup>2</sup>Finnish Museum of Natural History, University of Helsinki, PO Box 17 (Pohjoinen Rautatiekatu 13), 00014  
7 Helsinki, Finland

8 \*Address for correspondence (Tel: +358 469 508 202; E-mail: [filipe.chichorrodecarvalho@helsinki.fi](mailto:filipe.chichorrodecarvalho@helsinki.fi))

9

## 10 ABSTRACT

11

12 Biodiversity is shrinking rapidly, and despite our efforts only a small part of it has been assessed for  
13 extinction risk. Identifying the traits that make species vulnerable might help us to predict the outcome for  
14 those less known. We gathered information on the relations of traits to extinction risk from 173  
15 publications, across all taxa, spatial scales and biogeographical regions, in what we think it is the most  
16 comprehensive compilation to date. Vertebrates and the Palearctic are the most studied taxon and region  
17 because of higher accumulation of data in these groups. Among the many traits that have been suggested  
18 to be good predictors, our meta-analyses were successful in identifying two as potentially useful in  
19 assessing risk for the lesser-known species: regardless of the taxon, species with small range and habitat  
20 breadth are more vulnerable to extinction. On the other hand, body size (the most studied trait) did not  
21 present a consistently positive or negative response. In line with recent research, we hypothesize that the

22 relationship between body size and extinction risk is shaped by different aspects, namely body size is a  
23 proxy for different phenomena depending on the taxonomic group.

24 Keywords: biological traits, body size, habitat breadth, meta-analysis, geographical range, threat status.

25

26

## 27 I. Introduction

28

29 The International Union for Conservation of Nature (IUCN) compiles and keeps updated a database with  
30 assessments of risk of extinction for species. As of January 2019, 26 840 (28%) of all 96 951 species in this  
31 list were either Critically Endangered, Endangered, or Vulnerable to extinction and 15 055 (16%) were Data  
32 Deficient (IUCN, 2019). Yet, species in the IUCN database mostly comprise well-known taxa (e.g. 67% of  
33 vertebrates have been assessed versus 0.8% of insects (IUCN, 2019)), and it will probably take decades until  
34 a reasonable proportion of many taxa, such as most invertebrates, are assessed (Cardoso *et al.*, 2011a, b,  
35 2012). Increasing the number of species in the database to the point where we have an unbiased picture of  
36 extinction risk across all organisms during the next years seems highly unlikely, as is the Barometer of Life  
37 goal of assessing 160 000 species by 2020 (Stuart *et al.*, 2010). Moreover, extinction is taxonomically  
38 selective (e.g. 63% of cycads are assessed as threatened versus ‘only’ about 13% of bird species (IUCN,  
39 2018)). The current proportions of endangered species might not represent the greater picture of species  
40 diversity. Therefore, alternative ways of predicting the risk of extinction of species are urgently needed.

41 Understanding which biological/ecological traits of species make them more vulnerable could help us  
42 predict their extinction risk and make species protection and conservation planning more efficient. This  
43 approach is not new. Some comparative studies can be traced back to the 19th century (see McKinney,  
44 1997, for a thorough historical perspective), and since the beginning of the new millennium many new  
45 comparative studies have arisen on the topic, as well as discussions over their usefulness (Fisher & Owens,  
46 2004; Cardillo & Meijaard, 2012; Murray *et al.*, 2014; Verde Arregoitia, 2016). Many traits have been tested  
47 across hundreds of publications. Body size, for example, was found to be positively correlated with  
48 extinction risk across multiple taxa (Seibold *et al.*, 2015; Terzopoulou *et al.*, 2015; Verde Arregoitia, 2016),  
49 either through direct effects (e.g. larger species require more resources) or as a proxy for other traits (e.g.  
50 larger species have slower life cycles and therefore respond more slowly to change). Range size and  
51 population density, even after considering that they are often used to quantify extinction risk, have also

52 been extensively tested and found to be relevant, at least for mammals (Purvis *et al.*, 2000a; González-  
53 Suárez, Gómez & Revilla, 2013; Bland *et al.*, 2015; Verde Arregoitia, 2016). Traits related to exposure to  
54 human pressures have also been relevant in predicting threats to species (Cardillo, 2003), and recently  
55 Murray *et al.* (2014) have called for more studies explicitly incorporating threats and the interplay between  
56 traits and threats into the analyses. The inclusion of threat information in predicting extinction risk has  
57 indeed proved to increase the explanatory power of models (Murray *et al.*, 2014), and in some cases the  
58 same trait can bolster extinction risk or prevent it, depending on the threat (González-Suárez *et al.*, 2013).

59 Most of the studies to date have focused on mammals (e.g. Purvis *et al.*, 2000a; Cardillo *et al.*, 2008;  
60 González-Suárez *et al.*, 2013) and other vertebrates (e.g. Owens & Bennett, 2000; Luiz *et al.*, 2016), with  
61 relatively few on plants (e.g. Sodhi *et al.*, 2008; Powney *et al.*, 2014; Stefanaki *et al.*, 2015) and  
62 invertebrates (e.g. Sullivan *et al.*, 2000; Koh, Sodhi & Brook, 2004; Arbetman *et al.*, 2017). Each study was  
63 made on different spatial settings and scales, testing different traits (often according to availability of data),  
64 and employed different methods and response variables. While this is necessary and valuable information,  
65 making sense of the plethora of contrasting results is difficult, and perceiving general trends and trying to  
66 cover current gaps and bias are urgent. In this work we attempt to answer the following questions through  
67 a comprehensive bibliography search, data exploration and meta-analysis:

- 68 ● Which traits have been studied more often?
- 69 ● Which traits have been suggested as predictors of extinction risk?
- 70 ● How generalizable are the past results, i.e., are there traits that have a consistent response across  
71 taxonomical groups and geographical settings?

## 72 II. Material and Methods

73

74 In this review we undertook two sequential analyses of studies that examined the relation between traits  
75 of species and their estimated extinction risk. The first one was an exploratory analysis of the literature,

76 that allowed us to identify the traits have been more studied and which were found to be most relevant.  
77 The second analysis consisted of multiple meta-analyses, in which comparable data extracted from a subset  
78 of the studies were used to understand and quantify trends across studies and taxa from all published data  
79 and to see whether any general conclusions could be made from existing literature.

## 80 (1) Bibliography selection

81 We were aiming to retrieve an extensive list of publications that explicitly performed comparative studies  
82 of biological/ecological traits and extinction risk/decline of species and to identify which traits, extrinsic  
83 factors and taxa were used in each analysis and at which spatial scale. In doing so, we first retrieved a list of  
84 candidate publications, and then we considered them or not for this review based on them meeting a set of  
85 criteria. To assemble the candidate list, we searched Web of Science using the keywords ‘trait\*’ and  
86 ‘extinct\*’ until July 2018, and we checked the abstracts and titles for appropriateness. Additionally, we  
87 collected all papers from previous similar reviews (Murray *et al.*, 2014; Verde Arregoitia, 2016), and  
88 included publications already known to us. To consider a given paper as relevant to our study, all the  
89 following conditions had to be met:

- 90 ● more than five species were involved in the study;
- 91 ● for each species there was information on at least one biological trait;
- 92 ● for each species there was a measurement of its extinction risk;
- 93 ● there was a statistical model linking the species traits (explanatory variables) to the extinction risk  
94 (response variables), assigning scores to each trait involved (not necessarily significance).

95  
96 We considered as measurements of extinction risk:

- 97 ● recent (anthropogenic) extinctions versus extant species;
- 98 ● any variable (continuous, ordinal, categorical or binary) directly indicating relative extinction risk,  
99 whether it was based on the IUCN Red List categories or not;
- 100 ● population trend data, or a proxy of population trend data, in time;

- 101       • any other variables that indicated decline of species over time and/or risk of extinction.

102

## 103 (2) Data collection

104 We assembled information on each comparative statistical test employed in each article. For each of these  
105 tests, we extracted information on the following (see also Table 1 and Appendix S1, S2):

- 106       • **Taxonomic group:** mammals, birds, reptiles, amphibians, fishes, insects, molluscs, other  
107       invertebrates, plants and fungi.
- 108       • **Geographical realm:** Afrotropics, Antarctic, Australasia, Indo-Malaya, Nearctic, Neotropics, Oceania  
109       and Palaeartic (Olson *et al.*, 2001).
- 110       • **Traits:** continuous, ordinal, categorical or binary – units, the number of observations (usually  
111       species), and whether there was a significant response to extinction risk for that test. We grouped  
112       traits with similar biological meaning into the same unified trait (e.g. body length and body mass  
113       into ‘body size’, all original names and assigned unified traits are available in Appendix S2).  
114       Henceforth, trait refers to these unified traits.

## 115 (3) Exploratory analysis

116 In the exploratory analysis we first compared the number of studies across taxa, biogeographical realms,  
117 proxy of extinction used, statistical methodology, and if phylogeny was controlled for. Next, we compared  
118 the number of studies and the number of measurements (the number of measurements corresponds to the  
119 total number of statistical coefficients of each trait, usually corresponding to the number of statistical tests  
120 for that trait) in which each trait was used and calculated the percentage of significant measurements of  
121 each trait. Statistical tests which did not assign significance levels to traits had to be excluded from this step  
122 (e.g. most decision tree methodologies).

#### 123 (4) Meta-analysis

124 To understand whether traits were positively or negatively related to extinction risk across the multiple  
125 studies, we performed meta-analyses for each continuous trait. Meta-analyses are useful because they  
126 allow the comparison of outcomes from different studies by converting the outcomes to effect sizes. The  
127 use of Fisher's Z as the effect size has the advantage of allowing very diverse statistical methodologies into  
128 the same effect size measurement. Effect sizes were obtained by transforming the statistics reported in the  
129 manuscripts (F, z, X<sup>2</sup>, t or r<sup>2</sup>) into Pearson's product-moment correlation coefficients (r) by applying  
130 equations (1) to (5) (Rosenthal, 1991) and then transforming r into Fisher's Z using equation (6) using R  
131 package metafor (Viechtbauer, 2010):

$$132 \quad r = \frac{z}{\sqrt{N}} \quad (1)$$

$$133 \quad r = \sqrt{\frac{t^2}{t^2 + df}} \quad (2)$$

$$134 \quad r = \sqrt{\frac{F_{1,df}}{F_{1,df} + df}} \quad (3)$$

$$135 \quad r = \sqrt{\frac{X_1^2}{N}} \quad (4)$$

$$136 \quad r = \sqrt{r^2} \quad (5)$$

$$137 \quad Z = \frac{1}{2 \ln \frac{1+r}{1-r}} \quad (6)$$

138 To ensure that the outcomes would be comparable, we restricted the analyses to univariate tests. To  
139 detect the overall effect size for each trait, we run linear mixed models. In relation to more traditional  
140 analytic tools, mixed models can be more flexible in controlling multiple measurements within studies (and  
141 hence non-independence of observations) through the use of random effects (see Prugh, 2009; Chaplin-  
142 Kramer *et al.*, 2011). Fisher's Z was the response variable and was weighted by the inverse of the sample  
143 sizes. The response variable was tested against the intercept term only, with random effects being  
144 taxonomic group and study.

145

### 146 III. Results

147 A total of 173 manuscripts fulfilled all criteria and were included in this study (Appendix S1).

#### 148 (1) Exploratory analysis

##### 149 (a) Studies

150 The number of publications relating traits to extinction risk has increased steadily (Fig. 1). Mammals and  
151 birds have received the most attention over the years, followed by fishes, insects and plants (Table 1). Most  
152 studies were conducted in the Palearctic region (Fig. 2), particularly for insects. Of particular note,  
153 amphibians, reptiles and mammals have been included in many studies focusing on the Australasian realm.  
154 Oceania and especially the Antarctic were the least represented biogeographical realms, with intermediate  
155 values in all the other regions.

##### 156 (b) Traits

157 Body size was by far the most studied trait (Fig. 3, Table S1), followed by geographical range size and  
158 fecundity. Among the traits that were present in at least 10% of the studies, geographical range size was  
159 the trait with the greatest proportion of studies with significant measurements (almost three quarters)  
160 (Fig. 3). Besides geographical range size, only location (the geographical setting of the study) was significant  
161 in at least half of the measurements, but many traits were significant in >40% of the tests: body size,  
162 habitat type, diet breadth, habitat breadth, temperature and microhabitat type (Fig. 3). Fecundity, while  
163 amongst the most tested traits, was significant in only 27% of the measurements.

164 Even when used in at least 10% of studies, not all of these traits were studied across all taxa. Body size and  
165 geographical range size were the only traits that were studied for all taxa (except for fungi, since the only  
166 study focusing on fungi did not attribute significance levels to traits and thus this group was not included  
167 here) and were significant in at least one test for each taxon (Appendix S3, Fig. S1 – S4).

168 Despite occurring in less than 10% of the studies, many traits have been found to be good predictors of  
169 extinction risk for some taxa. A number of traits (see Appendix S3 for the significances of all tested traits



170 within taxa) were tested in at least three studies and were significant at least once, even if for single taxa  
171 (torpor/hibernation and weaning age in mammals; duration of flight period in birds; temperature for  
172 breeding in fishes; overwintering stage in insects; pollen vector, reproduction type, dispersal agent, and  
173 seed size in plants).

## 174 (2) Meta-analysis

175 Geographical range size, habitat breadth, and body size were the only traits from which we could  
176 determine effect sizes and sample sizes from at least 10 studies including univariate tests – the minimum  
177 number that we considered reasonable in order to have confidence in the results of the meta-analyses.  
178 Effect sizes of geographical range size and body size mostly originated from mammal and bird studies but  
179 also from studies on reptiles, amphibians, fishes, insects, other invertebrates and plants (Appendix S4,  
180 Figs S5, S6). Effect sizes of habitat breadth also originated mostly from mammal and bird studies, yet  
181 reptile, amphibian, other invertebrates and plant studies were included (Appendix S4, Fig. S7).

182 For geographical range size and habitat breadth, the overall effect size was consistently and significantly  
183 negative across taxa and studies (Table 2, Appendix S4, Figs S5, S7). Contrastingly, the linear mixed model  
184 revealed an overall effect size not different from zero for body size (Table 2). Effect sizes of body size were  
185 either positive or negative (Appendix S4, Fig. S6), and while there was some tendency in mammals and  
186 birds for the effect sizes to be positive, although not consistently so, the effect sizes for plants and other  
187 invertebrates were strongly negative.

188

## 189 IV. Discussion

190

191 Our review clearly reveals the increasing importance of the study of species traits on the understanding and  
192 prediction of extinction risk. The interest in the subject, even if relatively recent, is increasing exponentially  
193 and shows no signs of slowing down. Yet, we also found that past studies were biased in scope in terms of

194 taxa, with vertebrates having the largest share, and spatial setting, with the Palearctic dominating across  
195 taxa, although Australasia is much studied for mammals, reptiles and amphibians. Such biases should be  
196 mostly due to a large body of accumulated knowledge on these taxa and regions, to which a predominance  
197 of researchers in these areas continue to contribute. The special interest in the Australasian mammals may  
198 be due to an ongoing debate on the role of body size in extinction risk in this particular region (Verde  
199 Arregoitia, 2016).

200 Despite being, to our knowledge, the largest review of the relation between traits and extinction risk to  
201 date, we are aware that this contribution might not include all relevant studies in this field. The proportion  
202 of non-vertebrate studies included in our study is larger than that of Murray *et al.* (2014), even though the  
203 bias is inevitable in any comprehensive study on this subject. We are, however, confident that this review is  
204 thorough and as unbiased as possible with current data.

#### 205 (1) Relation between traits and extinction risk

206 Geographical range size was the best predictor of extinction risk overall. This is not surprising, since small  
207 geographical range is one of the criteria used in IUCN assessments (criteria B, D2), and these assessments  
208 are the measure of extinction risk in many studies, which might lead to circular reasoning. However, even  
209 when excluding from the analyses all species considered threatened due to small range, range was still  
210 strongly associated with extinction risk (e.g. Purvis *et al.*, 2000a; Wang *et al.*, 2018). The mechanism behind  
211 this relationship is not entirely understood (Purvis *et al.*, 2000a), but geographical range size captures  
212 ecological and dispersal attributes of species that would require harder to obtain variables, such as overall  
213 abundance of species, which are important in understanding extinction risk (Polaina, Revilla & González-  
214 Suárez, 2016). The abundance–occupancy relationship is a well-known and thoroughly studied pattern, and  
215 many mechanisms relate abundance to extinction risk (Gaston *et al.*, 2002). Likewise, range size is related  
216 to the dispersal ability of species, determining the capacity of a species to occupy new areas to escape  
217 multiple pressures, and with habitat breadth, revealing the ability of a species to cope with habitat change  
218 or loss.

219 Among the studies we included in our analysis, species with greater habitat breadth (habitat generalists)  
220 were less prone to becoming extinct. Specialists have long been regarded as losers, and generalists as  
221 winners in the current extinction crisis (McKinney & Lockwood, 1999; Clavel, Juliard & Devictor, 2011).  
222 Whether this trend is due to the intrinsic specificity of the species or to geographical range size is, however,  
223 not trivial to discern. In the studies included in this review, most habitat breadth measures were derived  
224 from maps. Consequently, less widespread species have less sampling points and therefore might show  
225 smaller habitat breadth due to sampling bias alone (Burgman, 1989), when in reality we lack knowledge of  
226 whether they could thrive under different habitats. Nonetheless, Slatyer, Hirst & Sexton (2013) showed  
227 that even after taking into consideration sampling bias, the relationship between habitat breadth and  
228 geographical range size remains significant across taxa. Irrespective of the putative causes or relations to  
229 other variables, species with larger habitat breadth do have more chances to escape from multiple pressure  
230 types and are consistently less threatened across taxa and spatial settings.

231 Although almost half of all measurements of body size were significant, the meta-analyses revealed that  
232 the relationship between body size and extinction risk is not unidirectional. The interplay between body  
233 size and threat type is one of the reasons for this phenomenon. While larger bird species are threatened by  
234 overexploitation, smaller bird species are threatened by habitat loss or degradation (Owens and Bennet,  
235 2000). The same trend seems to apply at least to marine fishes (Olden, Hogan & Zanden, 2007) and  
236 mammals (González-Suárez *et al.*, 2013), taxa that are often targeted directly and selectively by man.  
237 Independently of threats, relationships may not even be linear. Threatened freshwater fishes are found  
238 both at the smaller and larger spectrum of body sizes (Olden *et al.*, 2007), and the same bimodal  
239 relationship is found when pooling all vertebrates together (Ripple *et al.*, 2017). In general, this bimodality  
240 seems to be derived from threat type, with different threats leading to increasing extinction risk of  
241 different body size classes.

242 Other traits for which we could not perform a quantitative analysis have also shown to be useful in  
243 predicting extinction risk under certain circumstances, such as those traits related to speed of life cycle and

244 reproductive output. Threat status has been positively related to species with decreased fecundity  
245 (Cardillo, 2003; González-Suárez & Revilla, 2013; Böhm *et al.*, 2016; Ribeiro *et al.*, 2016; but see Pinsky &  
246 Byler, 2015; Sreekar *et al.*, 2015), larger egg/neonatal sizes (Cardillo *et al.*, 2005; Jones, Fielding & Sullivan,  
247 2006; González-Suárez & Revilla, 2013; Pinsky & Byler, 2015) and longer generation lengths (Anderson *et*  
248 *al.*, 2011; Hanna & Cardillo, 2013; Jeppsson & Forslund, 2014; Comeros-Raynal *et al.*, 2016; but see  
249 Chessman, 2013. These traits usually correlate with each other and with body size and longevity: bigger,  
250 longer-lived species often have lower fecundity, bigger egg/neonatal sizes and longer generation lengths.  
251 These traits reduce the capability of species to compensate for high mortality rates (Pimm, Jones &  
252 Diamond, 1988; Purvis *et al.*, 2000a; González-Suárez *et al.*, 2013), even if their longer longevities should  
253 make them more apt to resist at lower densities as they survive longer and might be able to overcome  
254 short-lived threats (Pimm *et al.*, 1988). When species are directly persecuted by man, they are often bigger,  
255 with larger fecundity and egg/neonatal sizes (Owens & Bennett, 2000; González-Suárez *et al.*, 2013), and  
256 longer longevity alone is not sufficient to compensate for the high mortality. But when the threat is habitat  
257 loss, which indirectly increases mortality and/or reduces natality rates, the trend is non-existent or even  
258 reversed (Owens & Bennett, 2000; González-Suárez *et al.*, 2013), this being possibly due to the advantages  
259 of longer longevity alone.

260 Traits indicating preference towards specific environmental niches are commonly used across taxa and  
261 many data are available about them. Among those, temperature (optimal temperature or temperature of  
262 the species across its geographical range) and temperature range (range of temperatures tolerated by the  
263 species or range of temperatures found across its geographical range) were often important predictors in  
264 the studies that used them. Species with lower average temperatures within their range or narrower  
265 temperature ranges are especially at risk due to an increasingly warmer climate (Jiguet *et al.*, 2010;  
266 Grenouillet & Comte, 2014; Flousek *et al.*, 2015). In contrast, thriving under broad temperature ranges  
267 grants species the necessary flexibility to deal with environmental or climatic change and hence lower their  
268 extinction risk (Chessman, 2013; Lootvoet, Philippon & Bessa-Gomes, 2015). When exceptions were found,

269 these were due to the correlation of temperature with the true causes of change in extinction risk (e.g.  
270 Cooper *et al.*, 2008).

271 Although the generality of the pattern could not be confirmed across studies, species depending on  
272 habitats more affected by human influence are often more threatened (Stefanaki *et al.*, 2015; Powney *et*  
273 *al.*, 2014). In Greece, flowering plants occurring in coastal or ruderal habitats, under pressure from  
274 urbanization and tourism, were more at risk than flowering plants occurring on cliffs or high-mountain  
275 vegetation, the latter habitats being under lower human pressure (Stefanaki *et al.*, 2015). British plant  
276 species with lower affinity to nitrogen-rich soils are declining due to the intensification of agriculture, which  
277 has led to increased inputs of nitrogen in otherwise nitrogen-poor soils (Powney *et al.*, 2014). Likewise,  
278 microhabitat type was a good predictor of extinction risk in some studies due to some microhabitats  
279 becoming rarer with increased human pressure (Parent & Schriml, 1995; Seibold *et al.*, 2015). A striking  
280 example is the decline of saproxylic beetles that use dead wood of large diameter in Germany, as forest  
281 management options often lead to the scarcity of such microhabitat (Seibold *et al.*, 2015). These  
282 observations give support to recent claims that predicting extinction risk requires considering the threat  
283 type and using different variables related to human use of species and habitats (Murray *et al.*, 2014).

284 Both diet breadth and type were significant predictors across several studies. The diet of a species can be  
285 important in leading to and predicting extinction in two ways. Species restricted to fewer dietary options  
286 have shown to be more threatened (Basset *et al.*, 2015; Jeppsson & Forslund, 2014; González-Suárez *et al.*,  
287 2013; Matsuzaki *et al.*, 2011; Mattila *et al.*, 2008), probably due to lower flexibility in switching to other  
288 options when the availability of their preferred food source decreases (Purvis, Jones, & Mace, 2000). On the  
289 other hand, diet type, namely the trophic position of a species, may be as important. Species at higher  
290 trophic levels tend to be more threatened (Chessman, 2013; Bender *et al.*, 2013; Cardillo *et al.*, 2004; Purvis  
291 *et al.*, 2000a) and often provide early warnings of extinction across the entire food chain (Cardoso *et al.*,  
292 2010). The greater dependence on the densities and larger foraging areas of prey species may lead to such  
293 a pattern (Carbone & Gittleman, 2002), with synergistic effects between resource abundance and other

294 factors contributing to the decline of, for example, predators. With the density of wildlife dwindling  
295 everywhere (e.g. Hallmann *et al.*, 2017), and everything else being equal, top predators are expected to be  
296 more at risk.

297 Migration distance was often tested and found to be an important predictor. Most studies on migration  
298 distance are of birds. Long distance migrants tend to be more at risk, which could be either due to  
299 phenological mismatch due to climate change (Amano & Yamaura, 2007; Jiguet *et al.*, 2010; Thaxter *et al.*,  
300 2010; Flousek *et al.*, 2015), dependence on the good quality of at least two habitats or sites (Jiguet *et al.*,  
301 2010; Flousek *et al.*, 2015), or to increased competition with resident species that, in temperate regions,  
302 survive through increasingly less severe winters (Jiguet *et al.*, 2010; Amano & Yamaura, 2007).

303 Finally, there are also traits that were found to be significant but only studied for one or two taxa. These  
304 include a wide array of morphological traits that are taxon-specific. Some plant growth forms (e.g.  
305 herbaceous, bush or tree) are more threatened than others. Perennial growth forms can sustain  
306 populations through harsh times (Stefanaki *et al.*, 2015) but might be more affected by forest loss (Leão *et al.*,  
307 2014). Mammals going through a hibernating or torpor phase are less prone to becoming extinct, due  
308 to a greater capacity to avoid harsher seasonal conditions (Liow *et al.*, 2009). The life stage in which an  
309 insect overwinters (egg, larva, pupa or adult) influences vulnerability (e.g. Powney *et al.*, 2015; Jeppsson &  
310 Forslund, 2014; Mattila *et al.*, 2009). At least for some studies with applied relevance, Cardillo & Meijaard  
311 (2012) claim that ‘researchers should adopt a somewhat “smaller picture” view by restricting the  
312 geographical and taxonomic scope of comparative analyses, and aiming for clearer, more focused  
313 outcomes on particular hypotheses’. We corroborate that restricting the studies in these two dimensions  
314 might prove useful when the goal goes beyond understanding the general pattern and requires true  
315 predictive power for species extinctions.

## 316 (2) Generalization

317 Given the inherent bias of past studies, any generalizations require critical consideration. Geographical  
318 range and habitat breadth seem to be very well supported across taxa and regions, even if most past

319 studies using such traits were on vertebrates. Both are consistently negatively related to extinction risk and  
320 might be seen as representing a single phenomenon: the range or rarity of a species in two different  
321 dimensions (area and habitat). Species with larger ranges, be these spatial or biotic, have more chance of  
322 surviving in case of diminishing availability of resources, and the risk of their populations or the entire  
323 species vanishing is smaller. These traits can therefore be confidently used as predictors of extinction risk  
324 across taxa. Area and habitat are in fact two of the three dimensions of rarity preconized by Rabinowitz  
325 (1981): geographical range size, habitat breadth, and local abundance. The latter was seldom used probably  
326 due to the scarcity of abundance data for most taxa (the Prestonian shortfall, Cardoso *et al.*, 2011b) but is  
327 certainly crucial to fully understand the extinction phenomenon.

328 Body size, on the other hand, seems to be at least taxon dependent, probably because, as previously  
329 mentioned, it represents different ways in which species interact with their environment and therefore  
330 how they affect their risk of extinction (González-Suárez *et al.*, 2013; Ripple *et al.*, 2017). This trait is often  
331 studied as a proxy for traits that may be very hard to measure or are very abstract. If for animals it usually is  
332 related to resource availability, as larger animals require more, often scarce, resources, being these, space,  
333 food or other, for plants it represents competitive ability, with larger plants being able to better exploit, for  
334 example, the sun, by growing taller and overshadowing smaller species, or water and mineral resources  
335 found deeper underground.

336 In this review, we reinforced the notion that species with smaller ranges, and those with narrow habitat  
337 breadths are more at risk than others, regardless of the taxon or geographic distribution. We must  
338 emphasize, however, that we still lack a complete and unbiased picture of the relation between traits and  
339 extinction risk and that future studies could and should provide insights much beyond what is possible now.  
340 Many traits were found to be important across studies but have seldom been studied or are relevant for  
341 only some taxa. Not only that, but the intricate links between e.g. body size and extinctions provide reason  
342 for further studies to focus not only on the threat status of a species, but also on the underlying threat  
343 (whether it be human persecution, habitat degradation, climate change, or invasive species).





## 345 VI. Acknowledgements

346 We thank Sini Seppälä, Jon Rikberg and Fernando Urbano-Tenorio for their suggestions in earlier stages  
347 of this work, and to Marina Ferreira for useful suggestions on the manuscript. We would also like to  
348 thank Cathryn Primrose-Mathisen who provided professional English language assistance during the  
349 preparation of this article. She was not responsible for reviewing the final version. F.C. and this project  
350 were funded by Kone Foundation.

## 351 VII. References

- 352 Amano, T., & Yamaura, Y. (2007). Ecological and life-history traits related to range contractions among  
353 breeding birds in Japan. *Biological Conservation*, *137*(2), 271–282.  
354 doi:[10.1016/j.biocon.2007.02.010](https://doi.org/10.1016/j.biocon.2007.02.010)
- 355 Anderson, S. C., Farmer, R. G., Ferretti, F., Houde, A. L. S., & Hutchings, J. A. (2011). Correlates of  
356 Vertebrate Extinction Risk in Canada. *BioScience*, *61*(7), 538–549. doi:[10.1525/bio.2011.61.7.8](https://doi.org/10.1525/bio.2011.61.7.8)
- 357 Arbetman, M. P., Gleiser, G., Morales, C. L., Williams, P., & Aizen, M. A. (2017). Global decline of  
358 bumblebees is phylogenetically structured and inversely related to species range size and pathogen  
359 incidence. *Proceedings of the Royal Society B: Biological Sciences*, *284*(1859), 20170204.  
360 doi:[10.1098/rspb.2017.0204](https://doi.org/10.1098/rspb.2017.0204)
- 361 Basset, Y., Barrios, H., Segar, S., Srygley, R. B., Aiello, A., Warren, A. D., ... Ramirez, J. A. (2015). The  
362 Butterflies of Barro Colorado Island, Panama: Local Extinction since the 1930s. *PLoS ONE*, *10*(8),  
363 e0136623. doi:[10.1371/journal.pone.0136623](https://doi.org/10.1371/journal.pone.0136623)
- 364 Bender, M. g., Floeter, S. r., Mayer, F. p., Vila-Nova, D. a., Longo, G. o., Hanazaki, N., ... Ferreira, C. e. l.  
365 (2013). Biological attributes and major threats as predictors of the vulnerability of species: a case  
366 study with Brazilian reef fishes. *Oryx*, *47*(02), 259–265. doi:[10.1017/S003060531100144X](https://doi.org/10.1017/S003060531100144X)
- 367 Bland, L. M., Collen, B., Orme, C. D. L., & Bielby, J. (2015). Predicting the conservation status of data-  
368 deficient species. *Conservation Biology*, *29*(1), 250–259. doi:[10.1111/cobi.12372](https://doi.org/10.1111/cobi.12372)

- 369 Böhm, M., Williams, R., Bramhall, H. R., McMillan, K. M., Davidson, A. D., Garcia, A., ... Collen, B. (2016).  
370 Correlates of extinction risk in squamate reptiles: the relative importance of biology, geography,  
371 threat and range size. *Global Ecology and Biogeography*, 25(4), 391–405. doi:[10.1111/geb.12419](https://doi.org/10.1111/geb.12419)
- 372 Burgman, M. A. (1989). The Habitat Volumes of Scarce and Ubiquitous Plants: A Test of the Model of  
373 Environmental Control. *The American Naturalist*, 133(2), 228–239. doi:[10.1086/284912](https://doi.org/10.1086/284912)
- 374 Carbone, C., & Gittleman, J. L. (2002). A Common Rule for the Scaling of Carnivore Density. *Science*,  
375 295(5563), 2273–2276. doi:[10.1126/science.1067994](https://doi.org/10.1126/science.1067994)
- 376 Cardillo, M. (2003). Biological determinants of extinction risk: why are smaller species less vulnerable?  
377 *Animal Conservation*, 6(1), 63–69. doi:[10.1017/S1367943003003093](https://doi.org/10.1017/S1367943003003093)
- 378 Cardillo, M., Mace, G. M., Gittleman, J. L., Jones, K. E., Bielby, J., & Purvis, A. (2008). The predictability of  
379 extinction: biological and external correlates of decline in mammals. *Proceedings of the Royal*  
380 *Society of London B: Biological Sciences*, 275(1641), 1441–1448. doi:[10.1098/rspb.2008.0179](https://doi.org/10.1098/rspb.2008.0179)
- 381 Cardillo, M., Mace, G. M., Jones, K. E., Bielby, J., Bininda-Emonds, O. R. P., Sechrest, W., ... Purvis, A.  
382 (2005). Multiple Causes of High Extinction Risk in Large Mammal Species. *Science*, 309(5738), 1239–  
383 1241. doi:[10.1126/science.1116030](https://doi.org/10.1126/science.1116030)
- 384 Cardillo, M., & Meijaard, E. (2012). Are comparative studies of extinction risk useful for conservation?  
385 *Trends in Ecology & Evolution*, 27(3), 167–171. doi:[10.1016/j.tree.2011.09.013](https://doi.org/10.1016/j.tree.2011.09.013)
- 386 Cardillo, M., Purvis, A., Sechrest, W., Gittleman, J. L., Bielby, J., & Mace, G. M. (2004). Human Population  
387 Density and Extinction Risk in the World's Carnivores. *PLoS Biol*, 2(7), e197. doi:  
388 [10.1371/journal.pbio.0020197](https://doi.org/10.1371/journal.pbio.0020197)
- 389 Cardoso, P., Borges, P. A. V., Triantis, K. A., Ferrández, M. A., & Martín, J. L. (2011). Adapting the IUCN  
390 Red List criteria for invertebrates. *Biological Conservation*, 144(10), 2432–2440.  
391 doi:[10.1016/j.biocon.2011.06.020](https://doi.org/10.1016/j.biocon.2011.06.020)
- 392 Cardoso, P., Borges, P. A. V., Triantis, K. A., Ferrández, M. A., & Martín, J. L. (2012). The  
393 underrepresentation and misrepresentation of invertebrates in the IUCN Red List. *Biological*  
394 *Conservation*, 149(1), 147–148. doi:[10.1016/j.biocon.2012.02.011](https://doi.org/10.1016/j.biocon.2012.02.011)

- 395 Cardoso, P., Erwin, T. L., Borges, P. A. V., & New, T. R. (2011). The seven impediments in invertebrate  
396 conservation and how to overcome them. *Biological Conservation*, *144*(11), 2647–2655.  
397 doi:[10.1016/j.biocon.2011.07.024](https://doi.org/10.1016/j.biocon.2011.07.024)
- 398 Chaplin-Kramer, R., O'Rourke, M. E., Blitzer, E. J., & Kremen, C. (2011). A meta-analysis of crop pest and  
399 natural enemy response to landscape complexity. *Ecology Letters*, *14*(9), 922–932.  
400 doi:[10.1111/j.1461-0248.2011.01642.x](https://doi.org/10.1111/j.1461-0248.2011.01642.x)
- 401 Chessman, B. C. (2013). Identifying species at risk from climate change: Traits predict the drought  
402 vulnerability of freshwater fishes. *Biological Conservation*, *160*, 40–49.  
403 doi:[10.1016/j.biocon.2012.12.032](https://doi.org/10.1016/j.biocon.2012.12.032)
- 404 Clavel, J., Julliard, R., & Devictor, V. (2011). Worldwide decline of specialist species: toward a global  
405 functional homogenization? *Frontiers in Ecology and the Environment*, *9*(4), 222–228.  
406 doi:[10.1890/080216](https://doi.org/10.1890/080216)
- 407 Comeros-Raynal, M. T., Polidoro, B. A., Broatch, J., Mann, B. Q., Gorman, C., Buxton, C. D., ... Carpenter,  
408 K. E. (2016). Key predictors of extinction risk in sea breams and porgies (Family: Sparidae).  
409 *Biological Conservation*, *202*, 88–98. doi:[10.1016/j.biocon.2016.08.027](https://doi.org/10.1016/j.biocon.2016.08.027)
- 410 Cooper, N., Bielby, J., Thomas, G. H., & Purvis, A. (2008). Macroecology and extinction risk correlates of  
411 frogs. *Global Ecology and Biogeography*, *17*(2), 211–221. doi:[10.1111/j.1466-8238.2007.00355.x](https://doi.org/10.1111/j.1466-8238.2007.00355.x)
- 412 DeAngelis, D. L., & Grimm, V. (2014). Individual-based models in ecology after four decades. *F1000Prime*  
413 *Reports*, *6*. doi:[10.12703/P6-39](https://doi.org/10.12703/P6-39)
- 414 Fisher, D. O., & Owens, I. P. F. (2004). The comparative method in conservation biology. *Trends in*  
415 *Ecology & Evolution*, *19*(7), 391–398. doi:[10.1016/j.tree.2004.05.004](https://doi.org/10.1016/j.tree.2004.05.004)
- 416 Flousek, J., Telenský, T., Hanzelka, J., & Reif, J. (2015). Population Trends of Central European Montane  
417 Birds Provide Evidence for Adverse Impacts of Climate Change on High-Altitude Species. *PLoS ONE*,  
418 *10*(10), e0139465. doi:[10.1371/journal.pone.0139465](https://doi.org/10.1371/journal.pone.0139465)

- 419 Gaston, K. J., Blackburn, T. M., Greenwood, J. J. D., Gregory, R. D., Quinn, R. M., & Lawton, J. H. (2002).  
420 Abundance–occupancy relationships. *Journal of Applied Ecology*, *37*(s1), 39–59. doi:[10.1046/j.1365-](https://doi.org/10.1046/j.1365-2664.2000.00485.x)  
421 [2664.2000.00485.x](https://doi.org/10.1046/j.1365-2664.2000.00485.x)
- 422 González-Suárez, M., Gómez, A., & Revilla, E. (2013). Which intrinsic traits predict vulnerability to  
423 extinction depends on the actual threatening processes. *Ecosphere*, *4*(6), 1–16. doi:[10.1890/ES12-](https://doi.org/10.1890/ES12-00380.1)  
424 [00380.1](https://doi.org/10.1890/ES12-00380.1)
- 425 González-Suárez, M., & Revilla, E. (2013). Variability in life-history and ecological traits is a buffer against  
426 extinction in mammals. *Ecology Letters*, *16*(2), 242–251. doi:[10.1111/ele.12035](https://doi.org/10.1111/ele.12035)
- 427 Grenouillet, G., & Comte, L. (2014). Illuminating geographical patterns in species' range shifts. *Global*  
428 *Change Biology*, *20*(10), 3080–3091. doi:[10.1111/gcb.12570](https://doi.org/10.1111/gcb.12570)
- 429 Hallmann, C. A., Sorg, M., Jongejans, E., Siepel, H., Hofland, N., Schwan, H., ... Kroon, H. de. (2017). More  
430 than 75 percent decline over 27 years in total flying insect biomass in protected areas. *PLoS ONE*,  
431 *12*(10), e0185809. doi:[10.1371/journal.pone.0185809](https://doi.org/10.1371/journal.pone.0185809)
- 432 Hanna, E., & Cardillo, M. (2013). A comparison of current and reconstructed historic geographic range  
433 sizes as predictors of extinction risk in Australian mammals. *Biological Conservation*, *158*, 196–204.  
434 doi:[10.1016/j.biocon.2012.08.014](https://doi.org/10.1016/j.biocon.2012.08.014)
- 435 IUCN. (2019). The IUCN Red List of Threatened Species. Version 2018-2. Retrieved January 16, 2019, from  
436 <http://www.iucnredlist.org>
- 437 Jeppsson, T., & Forslund, P. (2014). Species' traits explain differences in Red list status and long-term  
438 population trends in longhorn beetles: Traits and extinction risk in longhorn beetles. *Animal*  
439 *Conservation*, *17*(4), 332–341. doi:[10.1111/acv.12099](https://doi.org/10.1111/acv.12099)
- 440 Jiguet, F., Gregory, R. D., Devictor, V., Green, R. E., Voříšek, P., Van Strien, A., & Couvet, D. (2010).  
441 Population trends of European common birds are predicted by characteristics of their climatic  
442 niche. *Global Change Biology*, *16*(2), 497–505. doi:[10.1111/j.1365-2486.2009.01963.x](https://doi.org/10.1111/j.1365-2486.2009.01963.x)
- 443 Jones, M. J., Fielding, A., & Sullivan, M. (2006). Analysing Extinction Risk in Parrots using Decision Trees.  
444 *Biodiversity & Conservation*, *15*(6), 1993–2007. doi:[10.1007/s10531-005-4316-1](https://doi.org/10.1007/s10531-005-4316-1)

- 445 Koh, L. P., Sodhi, N. S., & Brook, B. W. (2004). Ecological Correlates of Extinction Proneness in Tropical  
446 Butterflies: Extinction Correlates of Tropical Butterflies. *Conservation Biology*, 18(6), 1571–1578.  
447 doi:[10.1111/j.1523-1739.2004.00468.x](https://doi.org/10.1111/j.1523-1739.2004.00468.x)
- 448 Leão, T. C. C., Fonseca, C. R., Peres, C. A., & Tabarelli, M. (2014). Predicting Extinction Risk of Brazilian  
449 Atlantic Forest Angiosperms: Neotropical Plant Extinction Risk. *Conservation Biology*, 28(5), 1349–  
450 1359. doi:[10.1111/cobi.12286](https://doi.org/10.1111/cobi.12286)
- 451 Liow, L. H., Fortelius, M., Lintulaakso, K., Mannila, H., & Stenseth, N. C. (2009). Lower Extinction Risk in  
452 Sleep-or-Hide Mammals. *The American Naturalist*, 173(2), 264–272. doi:[10.1086/595756](https://doi.org/10.1086/595756)
- 453 Lootvoet, A. C., Philippon, J., & Bessa-Gomes, C. (2015). Behavioral Correlates of Primates Conservation  
454 Status: Intrinsic Vulnerability to Anthropogenic Threats. *PLoS ONE*, 10(10), e0135585.  
455 doi:[10.1371/journal.pone.0135585](https://doi.org/10.1371/journal.pone.0135585)
- 456 Luiz, O. J., Woods, R. M., Madin, E. M. P., & Madin, J. S. (2016). Predicting IUCN Extinction Risk Categories  
457 for the World's Data Deficient Groupers (Teleostei: Epinephelidae). *Conservation Letters*, 9(5), 342–  
458 350. doi:[10.1111/conl.12230](https://doi.org/10.1111/conl.12230)
- 459 Matsuzaki, S.-I. S., Takamura, N., Arayama, K., Tominaga, A., Iwasaki, J., & Washitani, I. (2011). Potential  
460 impacts of non-native channel catfish on commercially important species in a Japanese lake, as  
461 inferred from long-term monitoring data. *Aquatic Conservation: Marine and Freshwater  
462 Ecosystems*, 21(4), 348–357. doi:[10.1002/aqc.1198](https://doi.org/10.1002/aqc.1198)
- 463 Mattila, N., Kotiaho, J. S., Kaitala, V., & Komonen, A. (2008). The use of ecological traits in extinction risk  
464 assessments: A case study on geometrid moths. *Biological Conservation*, 141(9), 2322–2328.  
465 doi:[10.1016/j.biocon.2008.06.024](https://doi.org/10.1016/j.biocon.2008.06.024)
- 466 McKinney, M. L. (1997). Extinction Vulnerability and Selectivity: Combining Ecological and  
467 Paleontological Views. *Annual Review of Ecology and Systematics*, 28, 495–516. Retrieved from  
468 <http://www.jstor.org/stable/2952502>

- 469 McKinney, M. L., & Lockwood, J. L. (1999). Biotic homogenization: a few winners replacing many losers in  
470 the next mass extinction. *Trends in Ecology & Evolution*, 14(11), 450–453. doi:[10.1016/S0169-](https://doi.org/10.1016/S0169-5347(99)01679-1)  
471 [5347\(99\)01679-1](https://doi.org/10.1016/S0169-5347(99)01679-1)
- 472 Murray, K. A., Verde Arregoitia, L. D., Davidson, A., Di Marco, M., & Di Fonzo, M. M. I. (2014). Threat to  
473 the point: improving the value of comparative extinction risk analysis for conservation action.  
474 *Global Change Biology*, 20(2), 483–494. doi:[10.1111/gcb.12366](https://doi.org/10.1111/gcb.12366)
- 475 Olden, J. D., Hogan, Z. S., & Zanden, M. J. V. (2007). Small fish, big fish, red fish, blue fish: size-biased  
476 extinction risk of the world's freshwater and marine fishes. *Global Ecology and Biogeography*,  
477 16(6), 694–701. doi:[10.1111/j.1466-8238.2007.00337.x](https://doi.org/10.1111/j.1466-8238.2007.00337.x)
- 478 Olson, D. M., Dinerstein, E., Wikramanayake, E. D., Burgess, N. D., Powell, G. V. N., Underwood, E. C., ...  
479 Kassem, K. R. (2001). Terrestrial Ecoregions of the World: A New Map of Life on Earth: A new global  
480 map of terrestrial ecoregions provides an innovative tool for conserving biodiversity. *BioScience*,  
481 51(11), 933–938. doi:[10.1641/0006-3568\(2001\)051\[0933:TEOTWA\]2.0.CO;2](https://doi.org/10.1641/0006-3568(2001)051[0933:TEOTWA]2.0.CO;2)
- 482 Owens, I. P. F., & Bennett, P. M. (2000). Ecological basis of extinction risk in birds: Habitat loss versus  
483 human persecution and introduced predators. *Proceedings of the National Academy of Sciences*,  
484 97(22), 12144–12148. doi:[10.1073/pnas.200223397](https://doi.org/10.1073/pnas.200223397)
- 485 Parent, S., & Schriml, L. M. (1995). A model for the determination of fish species at risk based upon life-  
486 history traits and ecological data. *Canadian Journal of Fisheries and Aquatic Sciences*, 52(8), 1768–  
487 1781. doi:[10.1139/f95-769](https://doi.org/10.1139/f95-769)
- 488 Pimm, S. L., Jones, H. L., & Diamond, J. (1988). On the Risk of Extinction. *The American Naturalist*, 132(6),  
489 757–785. Retrieved from <http://www.jstor.org/stable/2462261>
- 490 Pinsky, M. L., & Byler, D. (2015). Fishing, fast growth and climate variability increase the risk of collapse.  
491 *Proceedings of the Royal Society B: Biological Sciences*, 282(1813), 20151053.  
492 doi:[10.1098/rspb.2015.1053](https://doi.org/10.1098/rspb.2015.1053)

- 493 Polaina, E., Revilla, E., & González-Suárez, M. (2016). Putting susceptibility on the map to improve  
494 conservation planning, an example with terrestrial mammals. *Diversity and Distributions*, 22(8),  
495 881–892. doi:[10.1111/ddi.12452](https://doi.org/10.1111/ddi.12452)
- 496 Powney, G. D., Rapacciuolo, G., Preston, C. D., Purvis, A., & Roy, D. B. (2014). A phylogenetically-  
497 informed trait-based analysis of range change in the vascular plant flora of Britain. *Biodiversity and*  
498 *Conservation*, 23(1), 171–185. doi:[10.1007/s10531-013-0590-5](https://doi.org/10.1007/s10531-013-0590-5)
- 499 Prugh, L. R. (2009). An evaluation of patch connectivity measures. *Ecological Applications*, 19(5), 1300–  
500 1310. doi:[10.1890/08-1524.1](https://doi.org/10.1890/08-1524.1)
- 501 Purvis, A., Gittleman, J. L., Cowlishaw, G., & Mace, G. M. (2000). Predicting extinction risk in declining  
502 species. *Proceedings of the Royal Society of London B: Biological Sciences*, 267(1456), 1947–1952.  
503 doi:[10.1098/rspb.2000.1234](https://doi.org/10.1098/rspb.2000.1234)
- 504 Purvis, A., Jones, K. E., & Mace, G. M. (2000). Extinction. *BioEssays*, 22(12), 1123–1133.  
505 doi:[10.1002/1521-1878\(200012\)22:12<1123::AID-BIES10>3.0.CO;2-C](https://doi.org/10.1002/1521-1878(200012)22:12<1123::AID-BIES10>3.0.CO;2-C)
- 506 Rabinowitz, D. (1981). Seven forms of Rarity. In *Biological aspects of rare plant conservation* (pp. 205–  
507 217). New York: John Wiley & Sons Ltd.
- 508 Ribeiro, J., Colli, G. R., Caldwell, J. P., & Soares, A. M. V. M. (2016). An integrated trait-based framework  
509 to predict extinction risk and guide conservation planning in biodiversity hotspots. *Biological*  
510 *Conservation*, 195, 214–223. doi:[10.1016/j.biocon.2015.12.042](https://doi.org/10.1016/j.biocon.2015.12.042)
- 511 Ripple, W. J., Wolf, C., Newsome, T. M., Hoffmann, M., Wirsing, A. J., & McCauley, D. J. (2017). Extinction  
512 risk is most acute for the world’s largest and smallest vertebrates. *Proceedings of the National*  
513 *Academy of Sciences*, 201702078. doi:[10.1073/pnas.1702078114](https://doi.org/10.1073/pnas.1702078114)
- 514 Rosenthal, R. (1991). *Meta-Analytic Procedures for Social Research* (Vol. 6). London: SAGE Publications.
- 515 Seibold, S., Brandl, R., Buse, J., Hothorn, T., Schmidl, J., Thorn, S., & Müller, J. (2015). Association of  
516 extinction risk of saproxylic beetles with ecological degradation of forests in Europe: Beetle  
517 Extinction and Forest Degradation. *Conservation Biology*, 29(2), 382–390. doi:[10.1111/cobi.12427](https://doi.org/10.1111/cobi.12427)

- 518 Slatyer, R. A., Hirst, M., & Sexton, J. P. (2013). Niche breadth predicts geographical range size: a general  
519 ecological pattern. *Ecology Letters*, *16*(8), 1104–1114. doi:[10.1111/ele.12140](https://doi.org/10.1111/ele.12140)
- 520 Sodhi, N. S., Koh, L. P., Peh, K. S.-H., Tan, H. T. W., Chazdon, R. L., Corlett, R. T., ... Bradshaw, C. J. A.  
521 (2008). Correlates of extinction proneness in tropical angiosperms. *Diversity and Distributions*,  
522 *14*(1), 1–10. doi:[10.1111/j.1472-4642.2007.00398.x](https://doi.org/10.1111/j.1472-4642.2007.00398.x)
- 523 Sreekar, R., Huang, G., Zhao, J.-B., Pasion, B. O., Yasuda, M., Zhang, K., ... Harrison, R. D. (2015). The use  
524 of species-area relationships to partition the effects of hunting and deforestation on bird  
525 extirpations in a fragmented landscape. *Diversity and Distributions*, *21*(4), 441–450.  
526 doi:[10.1111/ddi.12292](https://doi.org/10.1111/ddi.12292)
- 527 Stefanaki, A., Kantsa, A., Tscheulin, T., Charitonidou, M., & Petanidou, T. (2015). Lessons from Red Data  
528 Books: Plant Vulnerability Increases with Floral Complexity. *PLoS ONE*, *10*(9), e0138414.  
529 doi:[10.1371/journal.pone.0138414](https://doi.org/10.1371/journal.pone.0138414)
- 530 Stuart, S. N., Wilson, E. O., McNeely, J. A., Mittermeier, R. A., & Rodríguez, J. P. (2010). The Barometer of  
531 Life. *Science*, *328*(5975), 177–177. doi:[10.1126/science.1188606](https://doi.org/10.1126/science.1188606)
- 532 Sullivan, M. S., Gilbert, F., Rotheray, G., Croasdale, S., & Jones, M. (2000). Comparative analyses of  
533 correlates of Red data book status: a case study using European hoverflies (Diptera: Syrphidae).  
534 *Animal Conservation*, *3*(2), 91–95.
- 535 Terzopoulou, S., Rigal, F., Whittaker, R. J., Borges, P. A. V., & Triantis, K. A. (2015). Drivers of extinction:  
536 the case of Azorean beetles. *Biology Letters*, *11*(6), 20150273. doi:[10.1098/rsbl.2015.0273](https://doi.org/10.1098/rsbl.2015.0273)
- 537 Thaxter, C. B., Joys, A. C., Gregory, R. D., Baillie, S. R., & Noble, D. G. (2010). Hypotheses to explain  
538 patterns of population change among breeding bird species in England. *Biological Conservation*,  
539 *143*(9), 2006–2019. doi:[10.1016/j.biocon.2010.05.004](https://doi.org/10.1016/j.biocon.2010.05.004)
- 540 Verde Arregoitia, L. D. (2016). Biases, gaps, and opportunities in mammalian extinction risk research.  
541 *Mammal Review*, *46*(1), 17–29. doi:[10.1111/mam.12049](https://doi.org/10.1111/mam.12049)
- 542 Viechtbauer, W. (2010). Conducting Meta-Analyses in R with the metafor Package. *Journal of Statistical*  
543 *Software*, *36*(3), 1–48. doi:[10.18637/jss.v036.i03](https://doi.org/10.18637/jss.v036.i03)



544 Wang, Y., Si, X., Bennett, P. M., Chen, C., Zeng, D., Zhao, Y., ... Ding, P. (2018). Ecological correlates of  
545 extinction risk in Chinese birds. *Ecography*, 41(5), 782–794. doi:[10.1111/ecog.03158](https://doi.org/10.1111/ecog.03158)

546

547

548      Figures  
549

550

551 Figure 1: Cumulative number of publications per taxon relating traits to extinction risk.

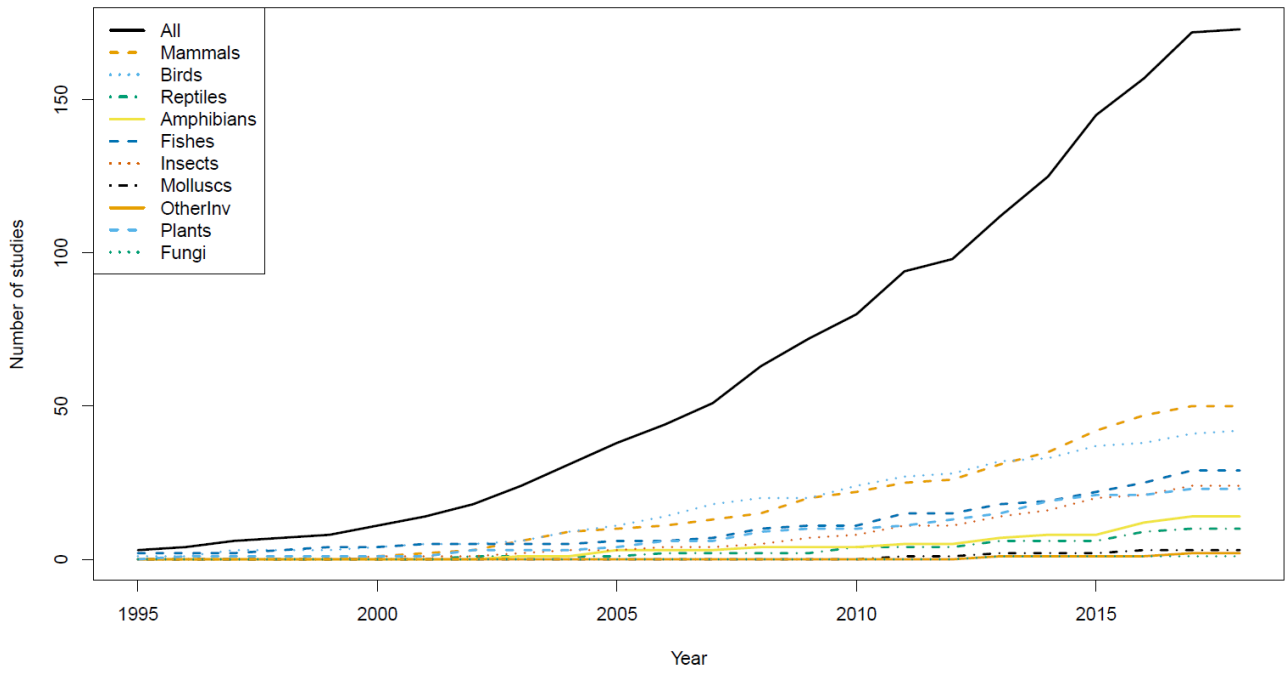

552

553

554

555 Figure 2: Proportion of manuscripts focusing on the different biogeographical regions by taxonomic group.

556 Numbers above columns are the total number of studies per taxon.

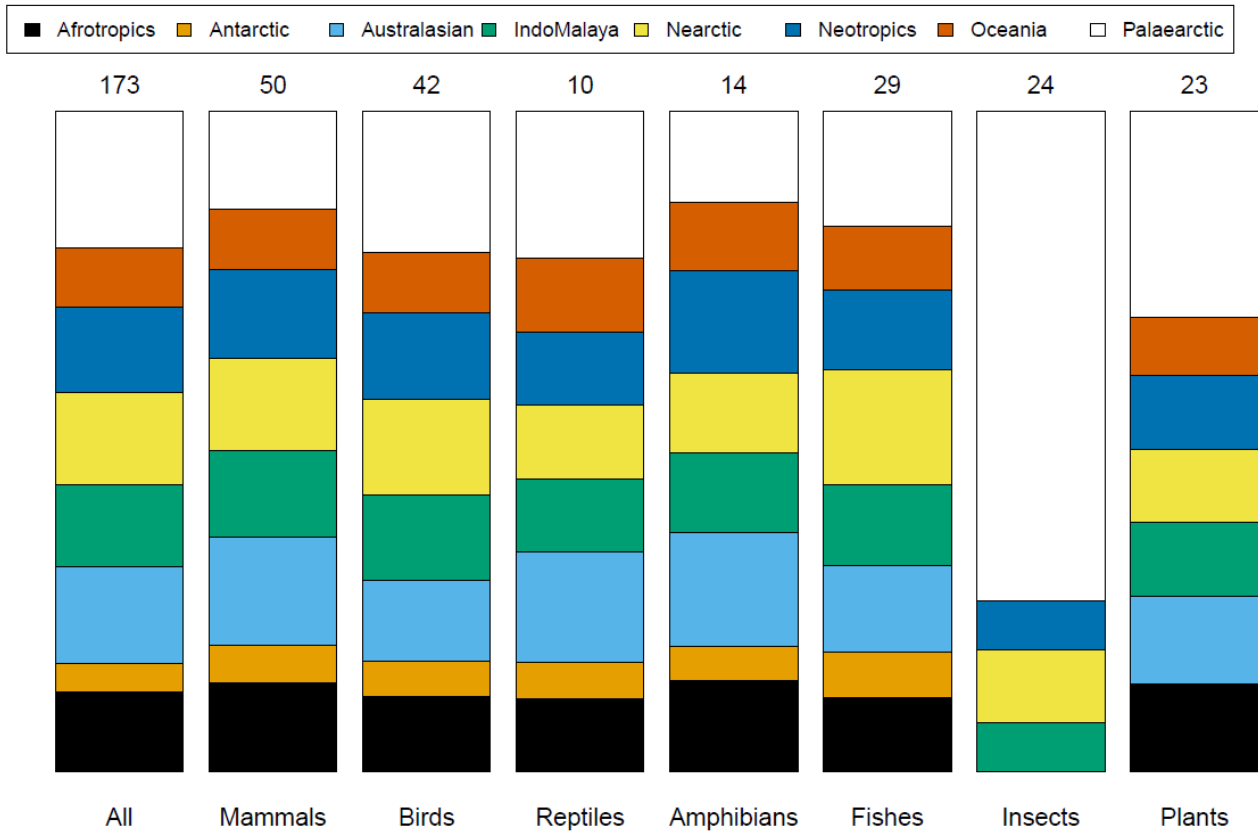

557

558

559

560

561

562 Figure 3: Summary information on variable use among all studies, depicting only variables included in at  
563 least 17 (10%) studies. The numbers before the dotted lines indicate the percentage of measurements in  
564 which the variable was significant. **Triangles:** number of studies in which the variable appears. **Circles:** total  
565 number of measurements for that variable.

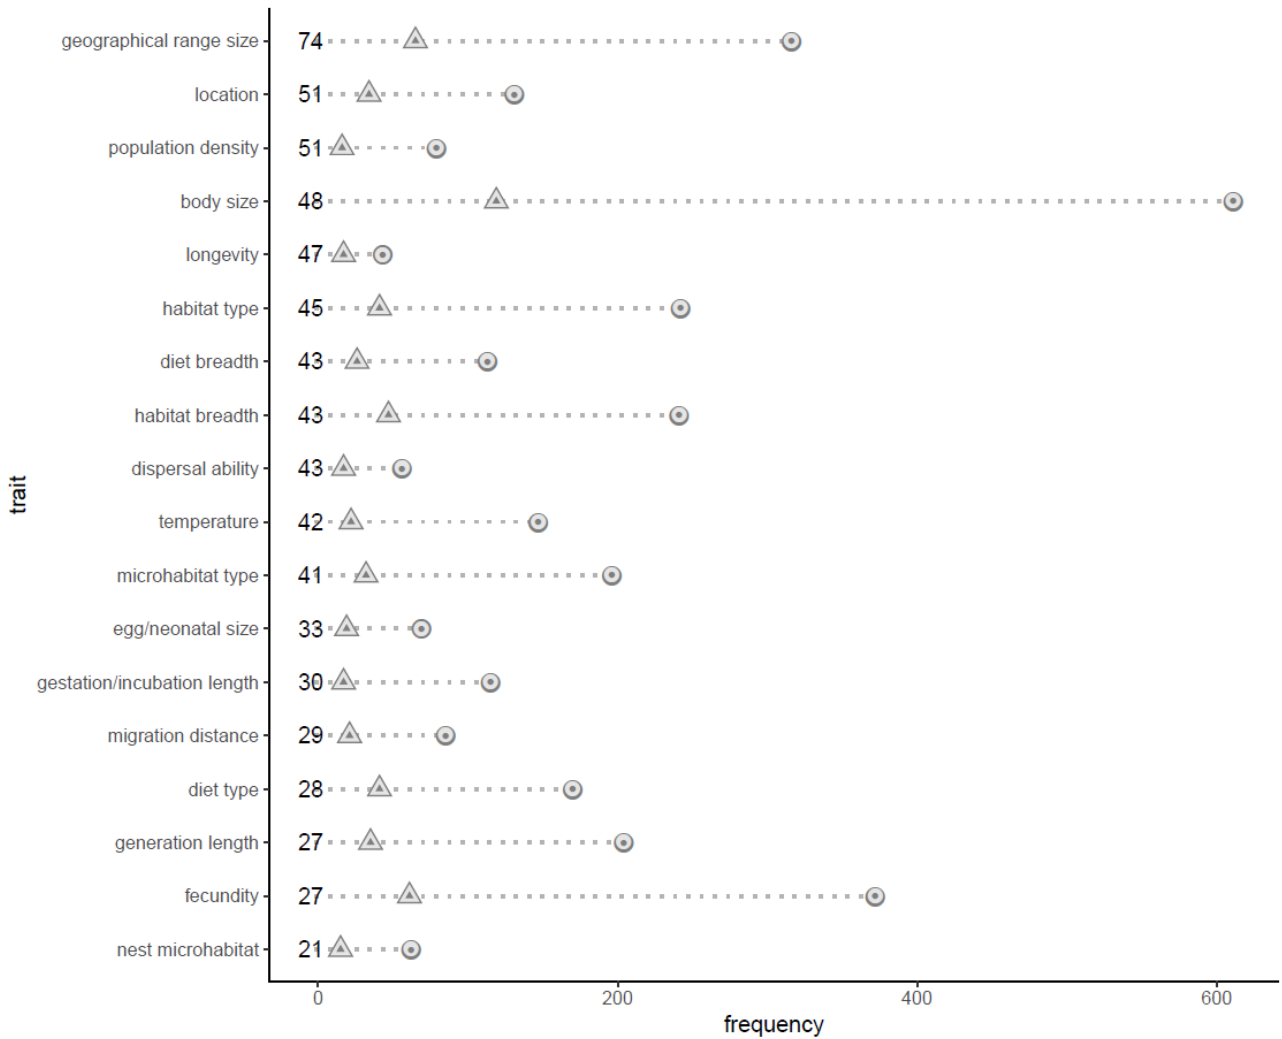

566

567

568 Tables

569 Table 1: Number of publications within each taxonomic group, response variables, statistical  
 570 approach, and controlling phylogeny or not. Percentages are of the number of publications within  
 571 each category divided by the total number of publications in the given taxonomic group. GEE =  
 572 generalized estimating equation; GLM = generalized linear model; GLMM = generalized linear  
 573 mixed model; LM = linear model; LMM = linear mixed model; PGCM = phylogenetic comparative  
 574 method. **Control of phylogeny:** we distinguished absolute no control of phylogeny (no) from at  
 575 least some control of phylogeny (yes, via using phylogenetic trees or a taxonomical higher group as  
 576 a controlling or covariable in the analyses).

|                      |                | All       | Mammals  | Birds    | Reptiles | Amphibians | Fishes   | Insects  | Plants   |
|----------------------|----------------|-----------|----------|----------|----------|------------|----------|----------|----------|
| No. of studies       |                | 173       | 50       | 42       | 10       | 14         | 29       | 24       | 23       |
| Response variable    | IUCNcateg      | 76 (44%)  | 35 (70%) | 14 (33%) | 4 (40%)  | 10 (71%)   | 12 (41%) | 3 (12%)  | 7 (30%)  |
|                      | Temporal Trend | 54 (31%)  | 9 (18%)  | 18 (43%) | 0 (0%)   | 3 (21%)    | 6 (21%)  | 11 (46%) | 8 (35%)  |
|                      | Other Redlists | 33 (19%)  | 7 (14%)  | 8 (19%)  | 6 (60%)  | 1 (7%)     | 6 (21%)  | 8 (33%)  | 6 (26%)  |
|                      | Other          | 19 (11%)  | 1 (2%)   | 3 (7%)   | 0 (0%)   | 0 (0%)     | 7 (24%)  | 4 (17%)  | 3 (13%)  |
| Approach             | DT based       | 20 (12%)  | 7 (14%)  | 3 (7%)   | 1 (10%)  | 4 (29%)    | 6 (21%)  | 1 (4%)   | 4 (17%)  |
|                      | GEE            | 5 (3%)    | 1 (2%)   | 2 (5%)   | 0 (0%)   | 0 (0%)     | 1 (3%)   | 0 (0%)   | 1 (4%)   |
|                      | GLM&LM         | 82 (47%)  | 16 (32%) | 19 (45%) | 7 (70%)  | 5 (36%)    | 14 (48%) | 13 (54%) | 14 (61%) |
|                      | GLMM&LMM       | 21 (12%)  | 6 (12%)  | 5 (12%)  | 1 (10%)  | 2 (14%)    | 5 (17%)  | 3 (12%)  | 4 (17%)  |
|                      | Non-parametric | 18 (10%)  | 2 (4%)   | 4 (10%)  | 1 (10%)  | 1 (7%)     | 5 (17%)  | 3 (12%)  | 2 (9%)   |
|                      | Other          | 9 (5%)    | 4 (8%)   | 2 (5%)   | 1 (10%)  | 2 (14%)    | 3 (10%)  | 1 (4%)   | 0 (0%)   |
|                      | PGCMs          | 64 (37%)  | 30 (60%) | 17 (40%) | 4 (40%)  | 4 (29%)    | 3 (10%)  | 6 (25%)  | 3 (13%)  |
| Control of phylogeny | yes            | 116 (67%) | 41 (82%) | 30 (71%) | 8 (80%)  | 9 (64%)    | 16 (55%) | 15 (62%) | 13 (57%) |
|                      | no             | 94 (54%)  | 23 (46%) | 22 (52%) | 7 (70%)  | 7 (50%)    | 16 (55%) | 15 (62%) | 15 (65%) |



577

578

579 Table 2: Results of the linear mixed-effect models relating extinction risk with body size, geographical range  
 580 size and habitat breadth. *df*: Degrees of freedom, *P*: p value.

| Model                                                                                       | Number of studies /<br>measurements /<br>different taxa | Taxa (number of<br>studies/measurements)                                                                                                                                   | Intercept<br>estimate<br>(standard<br>error) | <i>df</i> | t value | <i>P</i> |
|---------------------------------------------------------------------------------------------|---------------------------------------------------------|----------------------------------------------------------------------------------------------------------------------------------------------------------------------------|----------------------------------------------|-----------|---------|----------|
| Effect sizes of Geographical range size ~<br>(Intercept) + Random(Study) +<br>Random(Taxon) | 23/49/9                                                 | Mammals (8/12), Birds<br>(7/17), Reptiles (3/4),<br>Amphibians (3/4), Fishes<br>(2/4), Vertebrates (1/2),<br>Insects (2/4), Other<br>Invertebrates (1/1),<br>Plants (1/1)  | -0.480 (0.107)                               | 24.787    | -4.479  | 0.0001   |
| Effect sizes of body size ~ (Intercept) +<br>Random(Study) + Random(Taxon)                  | 31/85/9                                                 | Mammals (9/33), Birds<br>(11/26), Reptiles (4/9),<br>Amphibians (3/3), Fishes<br>(3/7), Vertebrates (1/1),<br>Insects (1/1), Other<br>invertebrates (1/1),<br>Plants (3/4) | 0.130 (0.104)                                | 11.000    | 1.251   | 0.237    |
| Effect sizes of Habitat breadth ~<br>(Intercept) + Random(Study) +<br>Random(Taxon)         | 14/27/6                                                 | Mammals (2/6), Birds<br>(6/13), Reptiles (2/3),<br>Amphibians (2/3),<br>Vertebrates (1/1), Other<br>invertebrates (1/1),<br>Plants (1/1)                                   | -0.210 (0.041)                               | 11.843    | -5.112  | 0.0003   |

581
